# Supplementary material for: Converting chicken manure into highly active N–P co-doped metal-free biocarbon electrocatalysts: effect of chemical treatment on their catalytic activity for the ORR
Source: Royal Society of Chemistry journal article supplement (doi:10.1039/c8se00583d), 2019-01-01
Supplement: c8se00583d1.pdf [file c8se00583d1.pdf]

## Supplementary information

Table S1. Relative atomic percentage of nitrogen and phosphorous species obtained from high-resolution deconvolution of N 1s and P 2p obtained from XPS spectra.

| Electrocatalyst   | Atomic relative percentage of nitrogen species (at %)                                     | Atomic relative percentage of phosphorous species (at%) |
|-------------------|-------------------------------------------------------------------------------------------|---------------------------------------------------------|
| B                 | N1 (34.4)<br>N2 (33.4)<br>N3 (24.2)<br>NO <sup>-2</sup> (8.1)                             | P-C (46.2)<br>P-O (53.8)                                |
| B <sub>ST</sub>   | N1 (10.9)<br>N-NH <sub>2</sub> (37.2)<br>N3 (10.8)<br>N4 (34.7)<br>NO <sup>-3</sup> (6.4) | P-O (53.6)<br>P=O (46.4)                                |
| B <sub>K</sub>    | N1 (62.5)<br>N2 (14.6)<br>N4 (12.7)<br>NO <sup>-2</sup> (10.2)                            | ND                                                      |
| B <sub>K-ST</sub> | N1 (42.3)<br>N3 (29.3)<br>N4 (8.1)<br>NO <sup>-3</sup> (20.3)                             | ND                                                      |
| B <sub>H</sub>    | Si <sub>3</sub> N <sub>4</sub> (7.2)<br>N1 (53.2)<br>N2 (24.3)<br>N4 (15.4)               | P-O (61.9)<br>P=O (38.1)                                |
| B <sub>H-ST</sub> | Si <sub>3</sub> N <sub>4</sub> (26.3)<br>N1 (13.3)<br>N2 (34.3)<br>N4 (26.1)              | P-C (45.1)<br>P-O (39.6)<br>P=O (15.3)                  |

Figure S1

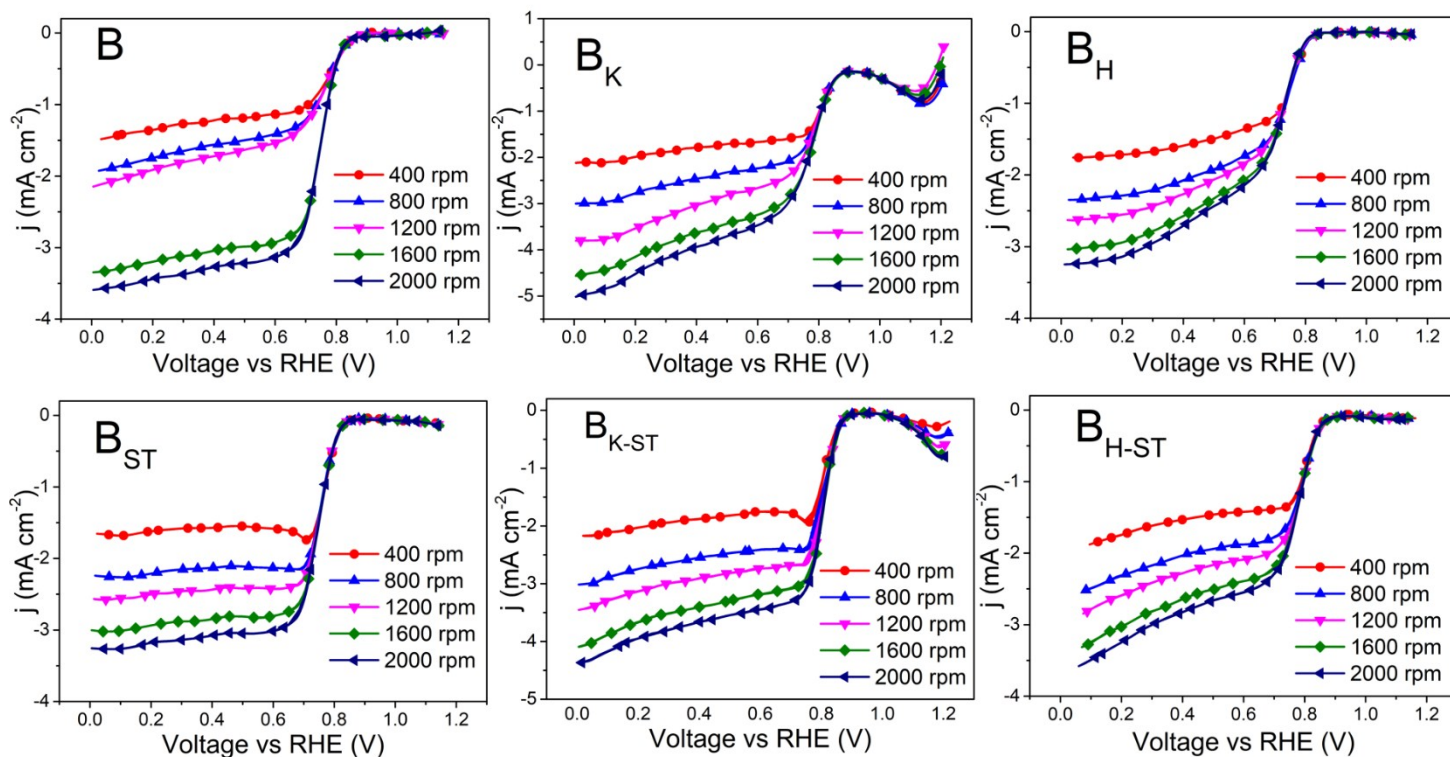

Figure S1. LSVs of the chicken manure-derived electrocatalysts performed in alkaline media ( $0.5 \text{ mol L}^{-1} \text{ KOH}$ ) at scan rate of  $5 \text{ mV s}^{-1}$  in a potential window of 1.2 to 0.05 V vs. RHE.

Figure S2

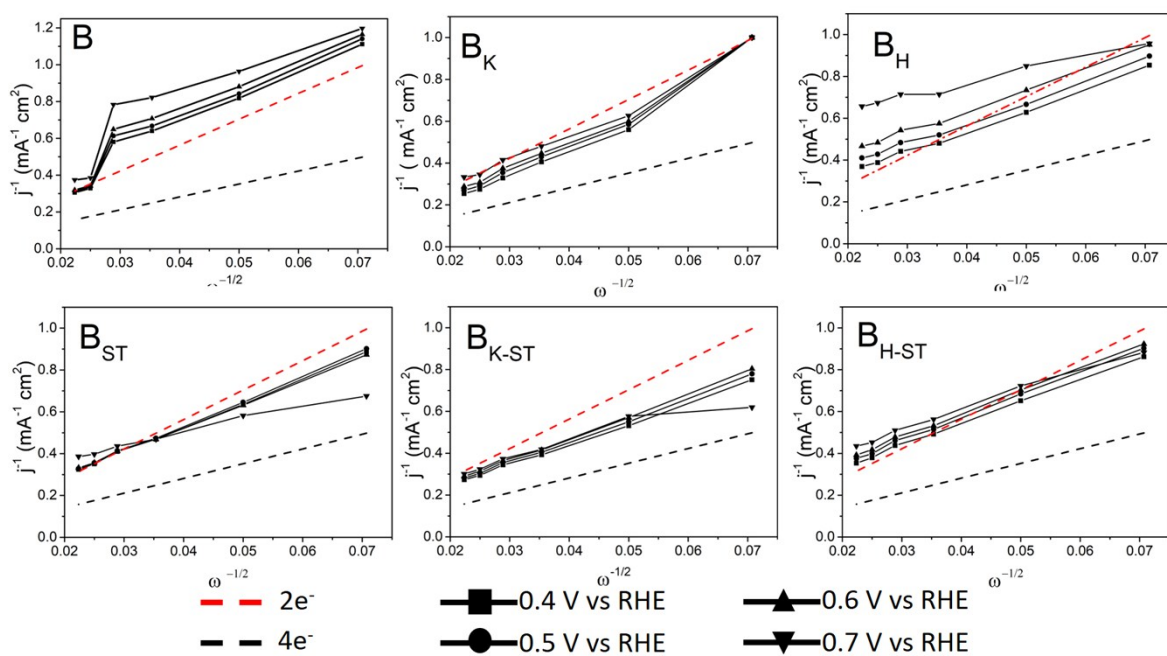

Figure S2. Koutecky-Levich plots of the non-noble metal electrocatalysts obtained from chicken manure.
